# Supplementary material for: Genetic, transcriptomic, histological, and biochemical analysis of progressive supranuclear palsy implicates glial activation and novel risk genes
Source: PubMed Central journal article supplement — Nat Commun. 2024 Sep 9;15:7880. doi: 10.1038/s41467-024-52025-x (PMC11385559; doi:10.1038/s41467-024-52025-x), 2024-09-09
Supplement: 41467_2024_52025_MOESM3_ESM.pdf [file 41467_2024_52025_MOESM3_ESM.pdf]

## Description of Additional Supplementary Files

**File Name:** Supplementary Data 1

**Description:** Shared genetic associations of previously identified PD SNPS

**File Name:** Supplementary Data 2

**Description:** Shared genetic associations of previously identified AD SNPS

**File Name:** Supplementary Data 3

**Description:** Genotyping and tissue collection sites, along with the number of samples (n), for both control and case groups in a study.

**File Name:** Supplementary Data 4

**Description:** Sources of PSP Cases and Controls

**File Name:** Supplementary Data 5

**Description:** Detailed description of reagents used in histological staining

**File Name:** Supplementary Data 6

**Description:** Western raw quants

**File Name:** Supplementary Data 7

**Description:** Image analysis subject data
